# Supplementary material
Source: publisher site journal article supplement (https://www.dovepress.com/article/572889)
Supplement: Supplementary file 1 [file 572889%20Supplementary%20Material.docx]

**Supplementary Table S1. Correlations between humoral immune markers and inflammatory biomarkers in SCADR patients (N=60)**

| **Pair (SCADR cohort)** | **Correlation method** | **r/ρ** | ***P*** |
| --- | --- | --- | --- |
| IgG vs CRP | Spearman ρ | -0.14 | 0.30 |
| IgA vs CRP | Spearman ρ | 0.11 | 0.41 |
| IgM vs CRP | Spearman ρ | -0.13 | 0.38 |
| C3 vs CRP | Spearman ρ | 0.60 | <0.001 |
| C4 vs CRP | Spearman ρ | 0.17 | 0.21 |
| IgG vs PCT | Spearman ρ | -0.10 | 0.55 |
| IgA vs PCT | Spearman ρ | -0.22 | 0.13 |
| IgM vs PCT | Spearman ρ | -0.15 | 0.28 |
| C3 vs PCT | Spearman ρ | -0.06 | 0.72 |
| C4 vs PCT | Spearman ρ | -0.09 | 0.59 |
| CRP vs PCT | Spearman ρ | -0.22 | 0.12 |
